# Supplementary material
Source: PubMed Central journal article supplement (PMC5385430)
Supplement: Supp_Fig1.pdf [file Supp_Fig1.pdf]

## Supplementary Data

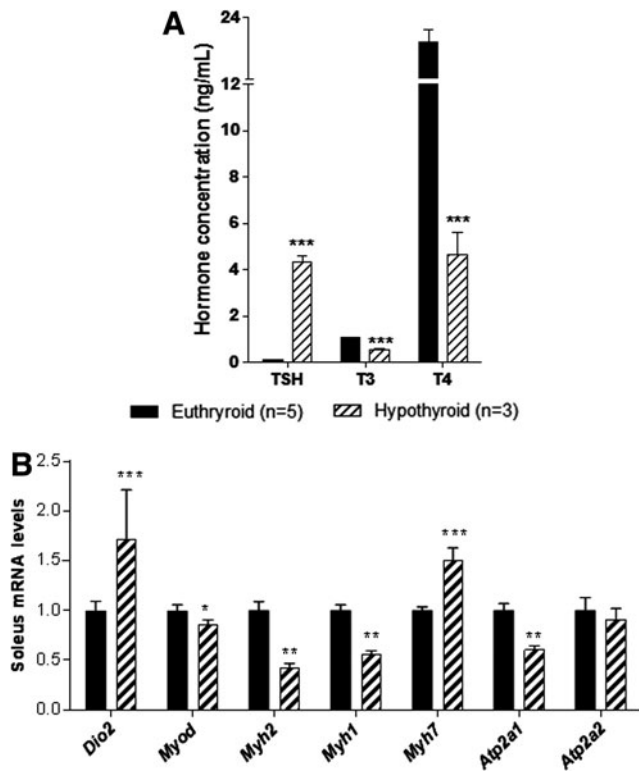

**SUPPLEMENTARY FIG. S1.** Effects of six weeks of hypothyroidism on T3-responsive genes expression in SOL muscle of C57B6 mice. **(A)** TSH, T3, and T4 plasma levels in euthyroid and hypothyroid mice. **(B)** T3-responsive genes mRNA levels in SOL. Values are the mean  $\pm$  SEM. \* $p \leq 0.05$ ; \*\* $p \leq 0.01$ ; \*\*\* $p \leq 0.001$  versus euthyroid mice. Sample size is shown in parentheses.
