# Supplementary material
Source: PubMed Central journal article supplement (PMC5385430)
Supplement: Supp_Fig2.pdf [file Supp_Fig2.pdf]

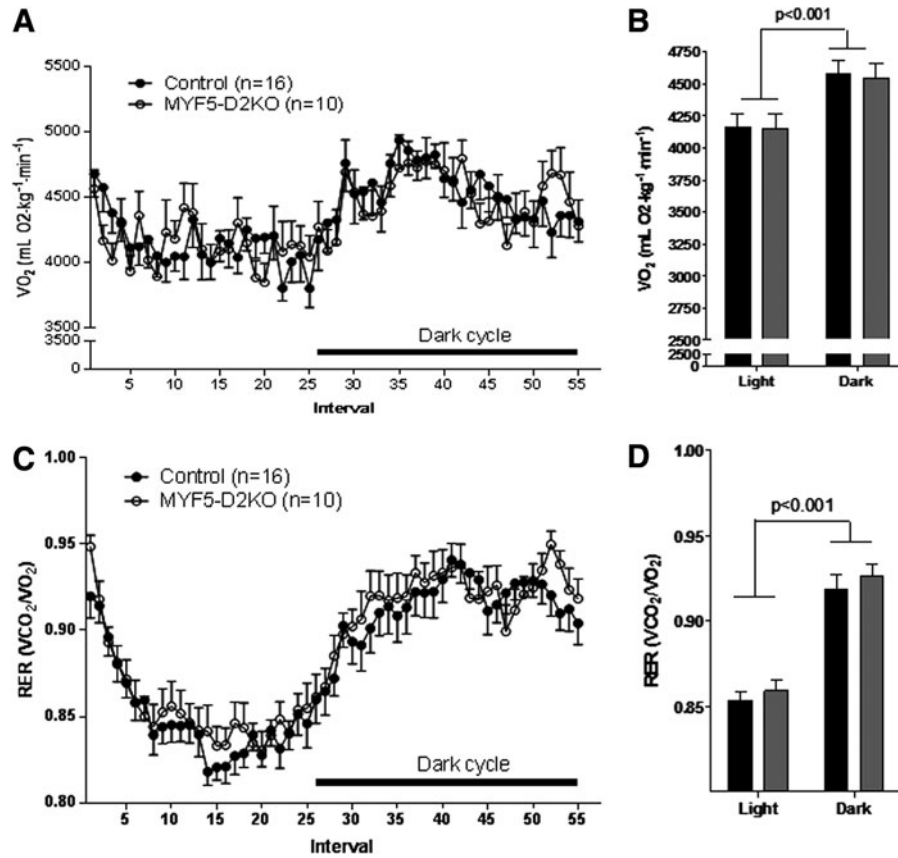

**SUPPLEMENTARY FIG. S2.** *MYF5-D2KO* mice exhibit a normal metabolic phenotype. (A) Oxygen consumption (VO<sub>2</sub>) of *Cre-MYF5* and *MYF5-D2KO* mice in every interval of 24 h period. (B) VO<sub>2</sub> average in light or dark cycles. (C) Same as (B) but respiratory exchange ratio (RER) is shown. (D) RER average in light or dark cycles. Values are the mean ± SEM. Sample size is shown in parentheses.
